# Supplementary material
Source: publisher site journal article supplement (https://www.dovepress.com/article/440902)
Supplement: Supplementary file 1 [file get_supplementary_file.php]

Supplemental Table 1. The odds ratios (ORs) for NA with reference to non-NA in logistic regression models for in-hospital complications within matched cohort(n=1072)

| In-hospital complications | OR | 95%CI | *P* value |
| --- | --- | --- | --- |
| Mortality | 0.545 | 0.260,1.144 | 0.109 |
| Stroke | 0.944 | 0.484,1.841 | 0.865 |
| MI | 1.000 | 0.062,16.008 | 1.000 |
| Arrhythmia | 0.836 | 0.586,1.192 | 0.322 |
| Pneumonia | 1.076 | 0.825,1.402 | 0.589 |
| Respiratory failure | 1.303 | 0.569,2.986 | 0.531 |
| Urinary tract infection | 0.124 | 0.016,0.995 | 0.049 |
| AKI | 1.238 | 0.840,1.823 | 0.280 |
| Wound infection | 0.664 | 0.270,1.631 | 0.372 |
| Anastomotic leakage | 0.832 | 0.236,1.933 | 0.669 |
| Thrombosis | 1.405 | 0.922,2.140 | 0.113 |

Notes: NA: noradrenaline; OR: odds ratio; CI: confidence interval; MI: myocardial infarction; AKI: acute kidney injury.

Supplemental Table 2. Descriptive statistics and logistic regression of intra- and post-operative outcomes in NA and non-NA in matched cohort(n=1072)

|  | Median(interquartile range) | OR | 95%CI | *P* value |
| --- | --- | --- | --- | --- |
| Crystalloid(ml) |  |  |  |  |
| NA | 1600(1100,2200) | 0.999 | 0.999,0.999 | 0.000 |
| Non-NA | 2600(2000,3200) | Reference |  |  |
| Colloid(ml) |  |  |  |  |
| NA | 500(0,500) | 1.000 | 0.999,1.000 | 0.030 |
| Non-NA | 500(0,500) | Reference |  |  |
| Blood loss |  |  |  |  |
| NA | 100(50,150) | 0.998 | 0.998,0.999 | 0.000 |
| Non-NA | 100(50,200) | Reference |  |  |
| Urine |  |  |  |  |
| NA | 300(200,600) | 0.999 | 0.999,0.999 | 0.000 |
| Non-NA | 500(300,800) | Reference |  |  |
| RBC n(%) |  |  |  |  |
| NA | 33(3.1%) | 0.327 | 0.218,0.490 | 0.000 |
| Non-NA | 95(8.9%) | Reference |  |  |
| Lactate level |  |  |  |  |
| Baseline |  |  |  |  |
| NA | 0.87(0.72,0.87) | 0.888 | 0.676,1.168 | 0.396 |
| Non-NA | 0.90(0.75,1.11) | Reference |  |  |
| End of surgery |  |  |  |  |
| NA | 0.90(0.73,1.18) | 1.184 | 0.955,1.468 | 0.123 |
| Non-NA | 0.89(0.72,1.15) | Reference |  |  |
| Lactate production |  |  |  |  |
| NA | 0.03(-0.14,0.22) | 1.354 | 1.051,1.744 | 0.019 |
| Non-NA | 0.00(-0.14,0.15) | Reference |  |  |
| Hospital stay |  |  |  |  |
| NA | 19(16,25) | 1.019 | 1.008,1.029 | 0.000 |
| Non-NA | 18(14,23) | Reference |  |  |

Notes: Data are median (interquartile range) or frequency (percentage); NA: noradrenaline; OR: odds ratio; CI: confidence interval; RBC: red blood cell.
